# Supplementary material for: Ablation of Cbl-b provides protection against transplanted and spontaneous tumors
Source: JCI journal article supplement (doi:10.1172/jci29472), 2007-03-16
Supplement: sd1 [file 1]

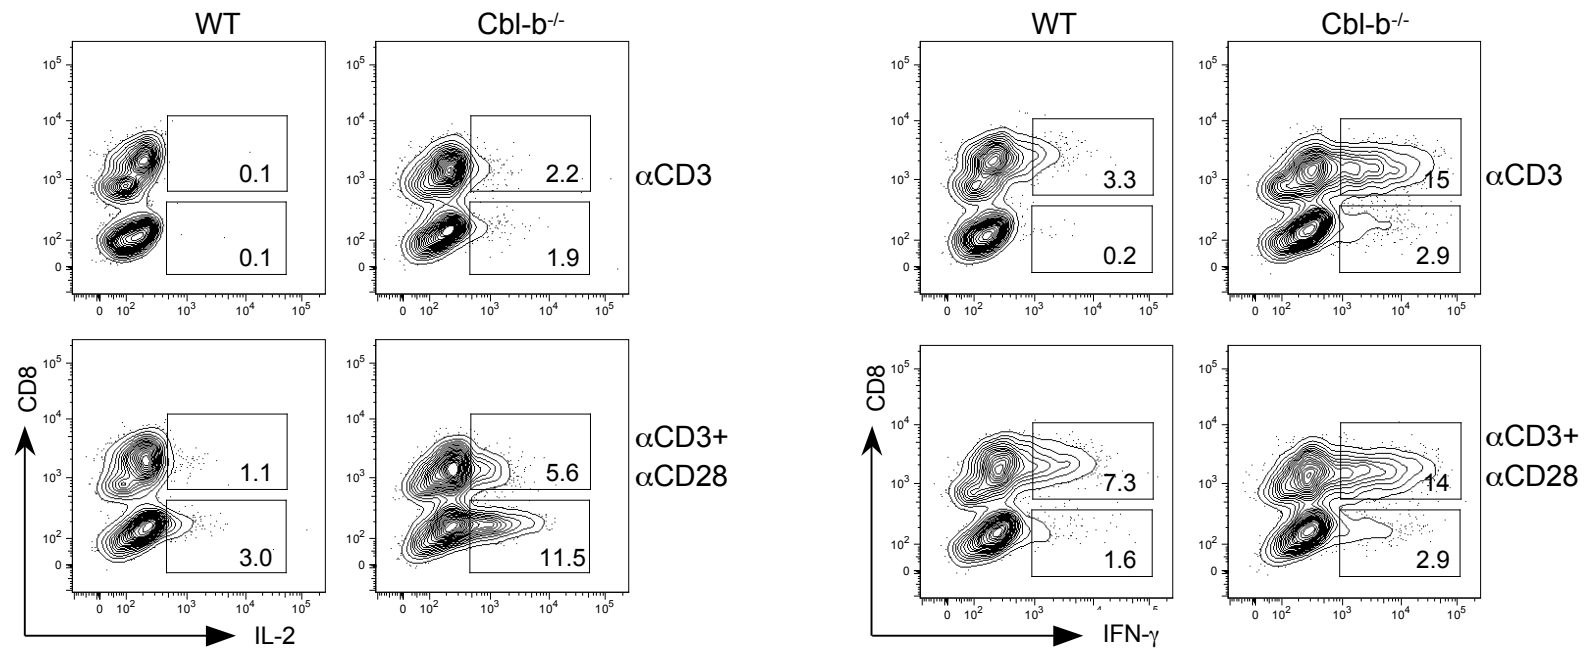

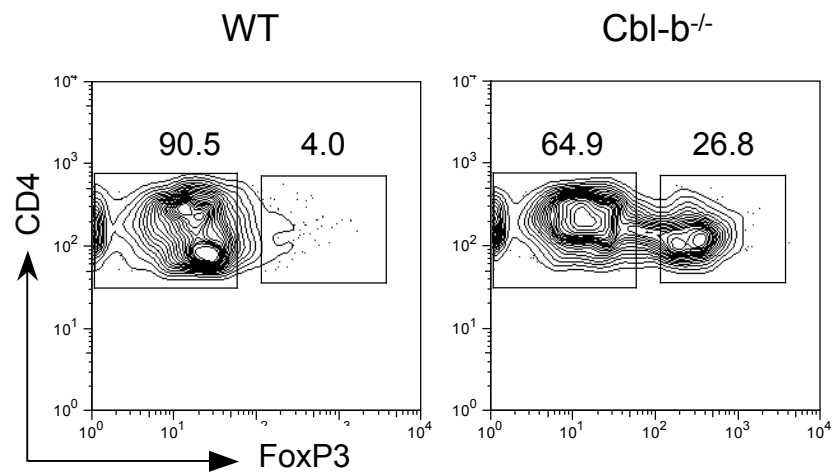

**Supplemental Figure 1.** Cytokine production by Cbl-b<sup>-/-</sup> T cells. Total T cells were stimulated by plate-bound anti-CD3 (5 µg/ml) alone or together with soluble anti-CD28 (5 µg/ml) antibodies. Plots show intracellular staining of IFN-γ and IL-2 production in CD8<sup>+</sup> T cells.

**Supplemental Figure 2.** Flow cytometric analysis of CD4<sup>+</sup> and T<sub>reg</sub> infiltrates in E.G7 tumor sites. Shown are CD4 vs Foxp3 staining of tumor infiltrates that were first gated by lymphocyte gate to eliminate most E.G7 tumor (large) cells, followed by gating on TCRβ expressing cells because E.G7 cells express a low level of TCR. Percentages of Foxp3<sup>+</sup> (T<sub>reg</sub>) and Foxp3<sup>-</sup> (conventional) CD4<sup>+</sup> T cells among total CD4<sup>+</sup> T cell infiltrates are indicated in the plots.
